# Supplementary material
Source: publisher site journal article supplement (https://www.dovepress.com/article/562602)

| Name | Sequence |
| --- | --- |
| LV-NRF2 shRNA | CCGGCATTTCACTAAACACAA |
| LV-TGFβ1 shRNA | CAGTTCAACATCACAGATGAA |
| LV-TP53 shRNA | CGGCGCACAGAGGAAGAGAAT |
| NRF2 Fwd | TCAGCGACGGAAAGAGTATGA |
| NRF2 Rev | CCACTGGTTTCTGACTGGATGT |
| TGFβ1 Fwd | GGCCAGATCCTGTCCAAGC |
| TGFβ1 Rev | GTGGGTTTCCACCATTAGCAC |
| TP53 Fwd | CAGCACATGACGGAGGTTGT |
| TP53 Rev | TCATCCAAATACTCCACACGC |
| β-actin Fwd | CATGTACGTTGCTATCCAGGC |
| β-actin Rev | CTCCTTAATGTCACGCACGAT |
|  |  |
|  |  |
|  |  |
|  |  |

**Supplementary Table S1** shRNA and primers

**Supplementary Figure S1：**Scientific hypothesis diagram（Greated with BioGDP.com）


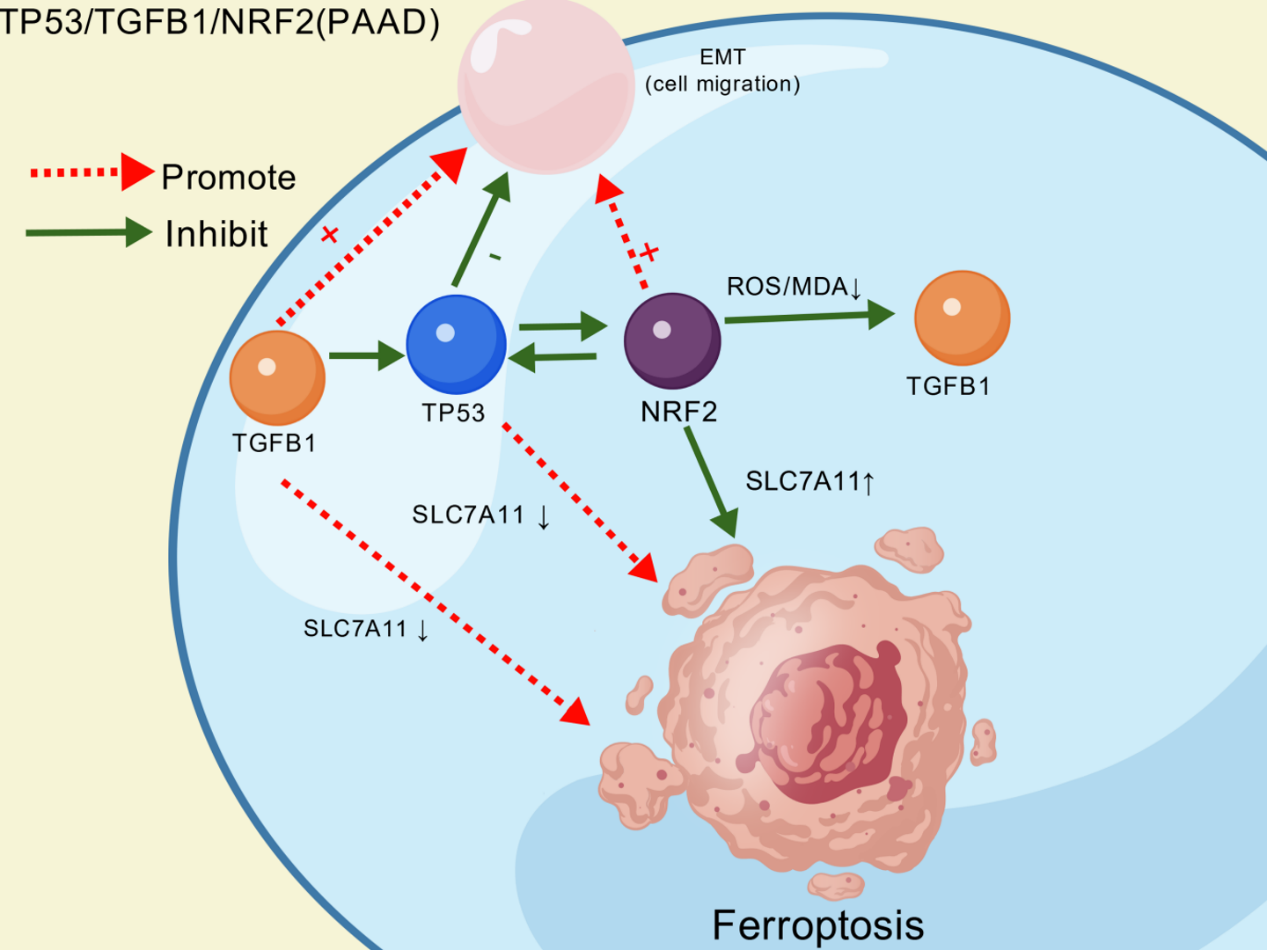

Supplement: Supplementary file 1 [file 562602%20Supplementary%20Material.docx]
